# Supplementary material for: Behavior Change Techniques Present in Wearable Activity Trackers: A Critical Analysis
Source: PubMed Central journal article supplement (PMC4917727; doi:10.2196/mhealth.4461), 2016-04-27
Supplement: mhealth_v4i2e40_app1.pdf [file mhealth_v4i2e40_app1.pdf]

**Appendix 1: CALO-RE Taxonomy Rating Data**

| Taxonomy Item | Wearable Activity Tracker |              |              |                   |            |                              |                |
|---------------|---------------------------|--------------|--------------|-------------------|------------|------------------------------|----------------|
|               | Fitbit Flex               | Jawbone UP24 | Misfit Shine | Nike+ Fuelband SE | Polar Loop | SparkPeople Activity Tracker | Withings Pulse |
| 1             | 0                         | 1            | 0            | 0                 | 0          | 1                            | 1              |
| 2             | 0                         | 1            | 0            | 0                 | 0          | 1                            | 0              |
| 3             | 1                         | 1            | 1            | 1                 | 1          | 1                            | 1              |
| 4             | 1                         | 1            | 1            | 1                 | 1          | 1                            | 1              |
| 5             | 1                         | 1            | 1            | 1                 | 0          | 1                            | 1              |
| 6             | 1                         | 1            | 0            | 0                 | 0          | 1                            | 1              |
| 7             | 0                         | 0            | 0            | 0                 | 0          | 0                            | 1              |
| 8             | 0                         | 0            | 0            | 0                 | 0          | 0                            | 0              |
| 9             | 0                         | 0            | 0            | 0                 | 0          | 0                            | 0              |
| 10            | 1                         | 1            | 1            | 1                 | 1          | 1                            | 1              |
| 11            | 1                         | 1            | 0            | 0                 | 0          | 1                            | 1              |
| 12            | 0                         | 0            | 0            | 1                 | 1          | 1                            | 1              |
| 13            | 1                         | 1            | 1            | 1                 | 1          | 1                            | 1              |
| 14            | 1                         | 0            | 0            | 1                 | 0          | 0                            | 1              |
| 15            | 0                         | 0            | 0            | 0                 | 0          | 0                            | 0              |
| 16            | 1                         | 1            | 1            | 1                 | 1          | 1                            | 1              |
| 17            | 1                         | 1            | 0            | 0                 | 0          | 1                            | 1              |
| 18            | 1                         | 1            | 1            | 1                 | 1          | 1                            | 1              |
| 19            | 1                         | 1            | 1            | 1                 | 1          | 1                            | 1              |
| 20            | 0                         | 0            | 0            | 0                 | 0          | 1                            | 1              |
| 21            | 0                         | 1            | 0            | 0                 | 1          | 1                            | 1              |
| 22            | 0                         | 0            | 0            | 0                 | 0          | 1                            | 0              |
| 23            | 0                         | 1            | 0            | 1                 | 1          | 0                            | 1              |
| 24            | 0                         | 0            | 0            | 0                 | 0          | 0                            | 0              |
| 25            | 0                         | 0            | 0            | 0                 | 0          | 0                            | 0              |
| 26            | 0                         | 1            | 0            | 0                 | 0          | 0                            | 1              |
| 27            | 0                         | 0            | 0            | 0                 | 0          | 0                            | 0              |
| 28            | 1                         | 1            | 1            | 1                 | 1          | 1                            | 1              |
| 29            | 1                         | 1            | 1            | 1                 | 1          | 1                            | 1              |
| 30            | 0                         | 0            | 0            | 0                 | 0          | 0                            | 0              |
| 31            | 0                         | 0            | 0            | 0                 | 0          | 0                            | 0              |
| 32            | 0                         | 0            | 0            | 0                 | 0          | 0                            | 0              |
| 33            | 0                         | 0            | 0            | 0                 | 0          | 0                            | 0              |
| 34            | 0                         | 0            | 0            | 0                 | 0          | 0                            | 0              |
| 35            | 0                         | 0            | 0            | 0                 | 0          | 0                            | 0              |
| 36            | 0                         | 0            | 0            | 0                 | 0          | 0                            | 0              |

|       |           |           |           |           |           |           |           |
|-------|-----------|-----------|-----------|-----------|-----------|-----------|-----------|
| 37    | 0         | 0         | 0         | 0         | 0         | 0         | 0         |
| 38    | 0         | 0         | 0         | 0         | 0         | 1         | 1         |
| 39    | 0         | 0         | 0         | 0         | 0         | 0         | 0         |
| 40    | 1         | 0         | 0         | 1         | 1         | 1         | 1         |
| Total | <b>15</b> | <b>18</b> | <b>10</b> | <b>14</b> | <b>13</b> | <b>21</b> | <b>23</b> |
